# Supplementary material for: Reduced Diversity in the Bacteriome of the Phytophagous Mite Brevipalpus yothersi (Acari: Tenuipalpidae)
Source: MDPI journal article supplement (doi:10.3390/insects7040080), 2016-12-20
Supplement: s1 [file s1]

# Supplementary Materials: Reduced Diversity in the Bacteriome of the Phytophagous Mite *Brevipalpus yothersi* (Acari: Tenuipalpidae)

Oscar E. Ospina, Steven E. Massey and Jose Carlos Verle Rodrigues

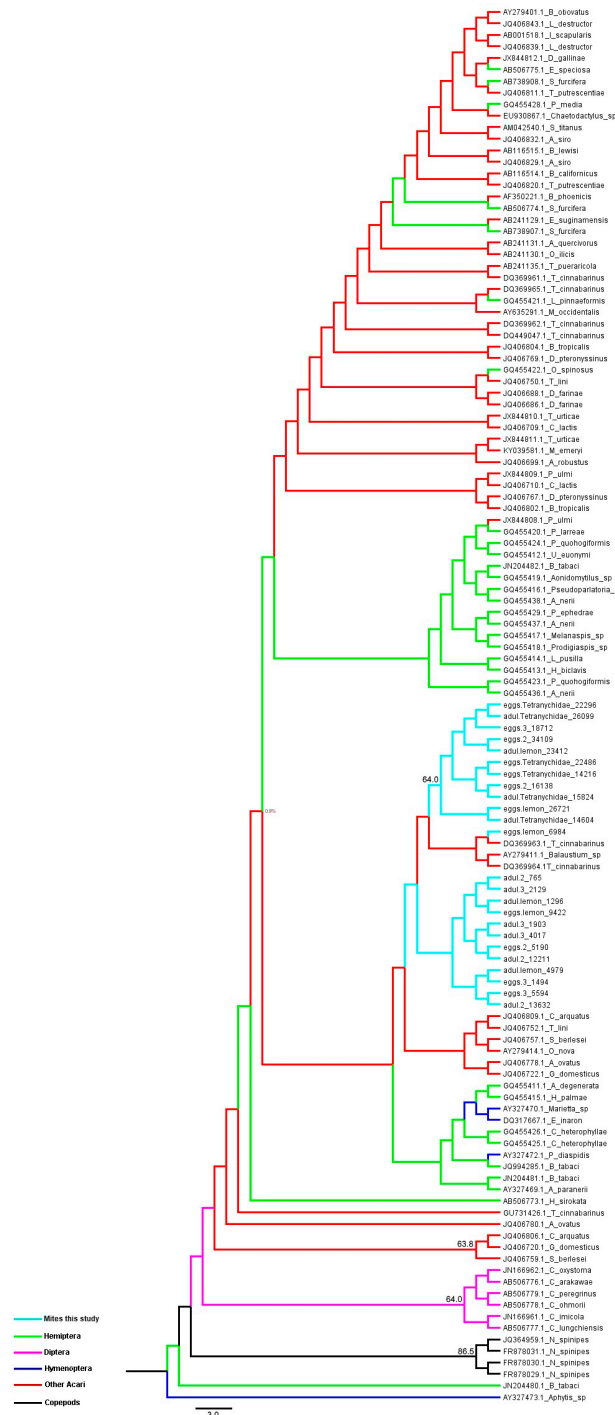

**Figure S1.** Complete version of the Maximum Parsimony tree for a representative sample of *Cardinium* sequences from different arthropods available at GenBank, and sequences obtained in this study. Color legend indicates the host from where the *Cardinium* were isolated and sequenced. Support values based on bootstrap resampling (1000 replicates) that were higher than 50% are shown. See Table S2 for accession numbers in the tree.

**Table S2.** Sequences from GenBank published elsewhere that were used in this study for phylogenetic inference in *Cardinium*.

| Accession number | Host                                | Reference |
|------------------|-------------------------------------|-----------|
| GQ455411         | <i>Abgrallaspis degenerata</i>      | --        |
| AB241131         | <i>Amphitetranychus quercivorus</i> | --        |
| GQ455419         | <i>Aonidomytilus</i> sp.            | --        |
| AY327473         | <i>Aphytis</i> sp.                  | [1]       |
| AY327469         | <i>Aspediotus paranerii</i>         | [1]       |
| GQ455436         |                                     |           |
| GQ455437         | <i>Aspidiotus nerii</i>             | --        |
| GQ455438         |                                     |           |
| AY279411         | <i>Balaustium</i> sp.               | [2]       |
| JQ994285         |                                     | --        |
| JN204480         |                                     |           |
| JN204481         | <i>Bemisia tabaci</i>               | [3]       |
| JN204482         |                                     |           |
| AB116514         | <i>Brevipalpus californicus</i>     | --        |
| AB116515         | <i>Brevipalpus lewisi</i>           | --        |
| AY279401         | <i>Brevipalpus obovatus</i>         | [2]       |
| AF350221         | <i>Brevipalpus phoenicis</i>        | --        |
| GQ455425         |                                     |           |
| GQ455426         | <i>Chionaspis heterophyllae</i>     | --        |
| AB506776         | <i>Culicoides arakawae</i>          | [4]       |
| JN166961         | <i>Culicoides imicola</i>           | [5]       |
| AB506777         | <i>Culicoides lungchiensis</i>      | [4]       |
| AB506778         | <i>Culicoides ohmorii</i>           | [4]       |
| JN166962         | <i>Culicoides oxystoma</i>          | [5]       |
| AB506779         | <i>Culicoides peregrinus</i>        | [4]       |
| DQ317667         | <i>Encarsia inaron</i>              | [6]       |
| AB241129         | <i>Eotetranychus suginamensis</i>   | --        |
| AB506775         | <i>Euides speciosa</i>              | [4]       |
| AB506773         | <i>Harmalia sirokata</i>            | [4]       |
| GQ455415         | <i>Hemiberlesia palmae</i>          | --        |
| GQ455413         | <i>Howardia biclavis</i>            | --        |
| GQ455421         | <i>Lepidosaphes pinnaeformis</i>    | --        |
| GQ455414         | <i>Leucaspis pusilla</i>            | --        |
| AY327470         | <i>Marietta</i> sp.                 | [1]       |
| GQ455417         | <i>Melanaspis</i> sp.               | --        |
| AY635291         | <i>Metaseiulus occidentalis</i>     | [7]       |
| FR878029         |                                     |           |
| FR878030         |                                     | --        |
| FR878031         | <i>Nitocra spinipes</i>             |           |
| JQ364959         |                                     | [8]       |
| GQ455422         | <i>Oceanaspidotus spinosus</i>      | --        |
| GQ455423         |                                     |           |
| GQ455424         | <i>Palinaspis quohogiformis</i>     | --        |
| GQ455429         | <i>Pallulaspis ephedrae</i>         | --        |
| JX844808         |                                     |           |
| JX844809         | <i>Panonychus ulmi</i>              | --        |
| AY327472         | <i>Plagiomerus diaspidis</i>        | [1]       |
| GQ455428         | <i>Poliaspis media</i>              | --        |
| GQ455418         | <i>Prodigisapis</i> sp.             | --        |

|          |                                 |      |
|----------|---------------------------------|------|
| GQ455420 | <i>Protargionia larreae</i>     | --   |
| GQ455416 | <i>Pseudoparlatoria</i> sp.     | --   |
| AM042540 | <i>Scaphoideus titanus</i>      | [9]  |
| AB506774 | <i>Sogatella furcifera</i>      | [4]  |
| DQ369965 |                                 |      |
| DQ449047 | <i>Tetranychus cinnabarinus</i> | [10] |
| GU731426 |                                 | --   |
| AB241135 | <i>Tetranychus pueraricola</i>  | --   |
| JX844811 | <i>Tetranychus urticae</i>      | --   |
| GQ455412 | <i>Unaspis euonymi</i>          | --   |

## References

1. Zchori-Fein, E.; Perlman, S.J. Distribution of the bacterial symbiont *Cardinium* in arthropods. *Mol. Ecol.* **2004**, *13*, 2009–2016.
2. Weeks, A.R.; Velten, R.; Stouthamer, R. Incidence of a new sex-ratio-distorting endosymbiotic bacterium among arthropods. *Proc. R. Soc. B Biol. Sci.* **2003**, *270*, 1857–1865.
3. Singh, S.T.; Priya, N.G.; Kumar, J.; Rana, V.S.; Ellango, R.; Joshi, A.; Priyadarshini, G.; Asokan, R.; Rajagopal, R. Diversity and phylogenetic analysis of endosymbiotic bacteria from field caught *Bemisia tabaci* from different locations of North India based on 16S rDNA library screening. *Infect. Genet. Evol.* **2012**, *12*, 411–419.
4. Nakamura, Y.; Kawai, S.; Yukuhiro, F.; Ito, S.; Gotoh, T.; Kisimoto, R.; Yanase, T.; Matsumoto, Y.; Kageyama, D.; Noda, H. Prevalence of *Cardinium* bacteria in planthoppers and spider mites and taxonomic revision of “*Candidatus Cardinium hertigii*” based on detection of a new *Cardinium* group from biting midges. *Appl. Environ. Microbiol.* **2009**, *75*, 6757–6763.
5. Morag, N.; Klement, E.; Saroya, Y.; Lensky, I.; Gottlieb, Y. Prevalence of the symbiont *Cardinium* in *Culicoides* (Diptera: Ceratopogonidae) vector species is associated with land surface temperature. *FASEB J.* **2012**, *26*, 4025–4034.
6. Perlman, S.J.; Kelly, S.E.; Zchori-Fein, E.; Hunter, M.S. Cytoplasmic incompatibility and multiple symbiont infection in the ash whitefly parasitoid, *Encarsia inaron*. *Biol. Control* **2006**, *39*, 474–480.
7. Jeyaprakash, A.; Hoy, M.A. Multiple displacement amplification in combination with high-fidelity PCR improves detection of bacteria from single females or eggs of *Metaseiulus occidentalis* (Nesbitt) (Acari: Phytoseiidae). *J. Invertebr. Pathol.* **2004**, *86*, 111–116.
8. Edlund, A.; Ek, K.; Breitholtz, M.; Gorokhova, E. Antibiotic-induced change of bacterial communities associated with the copepod *Nitocra spinipes*. *PLoS One* **2012**, *7*, e33107.
9. Marzorati, M.; Alma, A.; Sacchi, L.; Pajoro, M.; Palermo, S.; Brusetti, L.; Raddadi, N.; Balloi, A.; Tedeschi, R.; Clementi, E.; Corona, S.; Quaglino, F.; Bianco, P.A.; Beninati, T.; Bandi, C.; Daffonchio, D. A novel Bacteroidetes symbiont is localized in *Scaphoideus titanus*, the insect vector of Flavescence Doree in *Vitis vinifera*. *Appl. Environ. Microbiol.* **2006**, *72*, 1467–1475.
10. Liu, Y.; Miao, H.; Hong, X.Y. Distribution of the endosymbiotic bacterium *Cardinium* in chinese populations of the carmine spider mite *Tetranychus cinnabarinus* (Acari: Tetranychidae). *J. Appl. Entomol.* **2006**, *130*, 523–529.

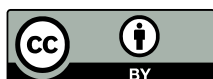

© 2016 by the authors; licensee MDPI, Basel, Switzerland. This article is an open access article distributed under the terms and conditions of the Creative Commons by Attribution (CC-BY) license (<http://creativecommons.org/licenses/by/4.0/>).
